# Supplementary material
Source: PubMed Central journal article supplement (PMC4443326)
Supplement: pnas.201424021SI.pdf [file pnas.201424021SI.pdf]

# Supporting Information

Hoepker et al. 10.1073/pnas.1424021112

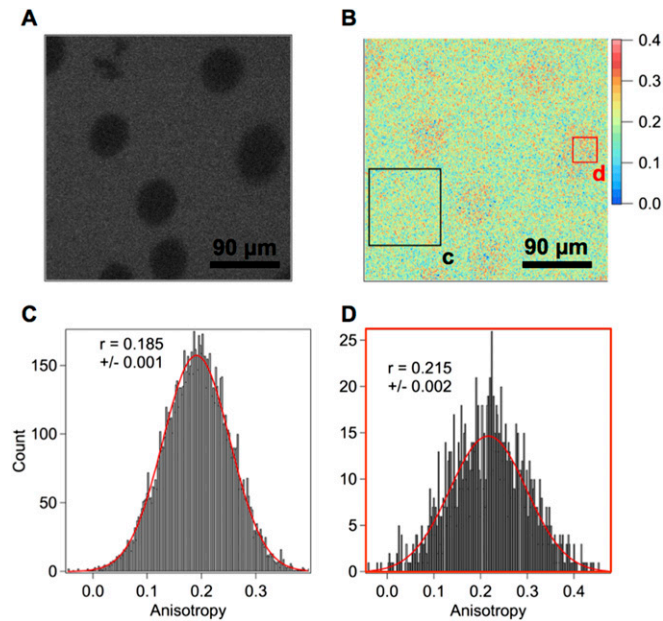

**Fig. S1.** Fluorescence intensity and anisotropy image of unlabeled agarose beads with 10  $\mu\text{M}$  His-tagged LUMP in buffer at 20  $^{\circ}\text{C}$ . (A) Fluorescence intensity image of unlabeled agarose bead showing no intensity at the bead. (B) FA image obtained from P- and S-polarized images with a G-factor of 0.78. (C) Anisotropy distribution of Box c in B. The anisotropy of 0.185 matches the anisotropy obtained from SLM-AB2 fluorometer measurement of His-LUMP. For comparison, LUMP without the His-tag measures 0.166, as referenced earlier. (D) Anisotropy distribution of Box d in B.

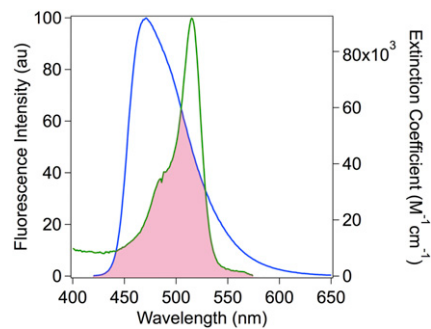

**Fig. S2.** Peak-normalized absorption spectrum of Venus (green trace) superimposed on fluorescence emission spectrum of LUMP (blue trace) in aqueous buffer [20 mM Hepes (pH 7.9), 150 mM NaCl] at 20  $^{\circ}\text{C}$ . The shaded area indicates the overlap integral  $J(\lambda)$  that is used to calculate the Förster radius  $R_0$  with a MATLAB (MathWorks) routine from [Fluortools.com](http://Fluortools.com). The maximum absorbance of Venus is set at its extinction coefficient:  $92,200 \text{ M}^{-1}\text{cm}^{-1}$ . The maximum emission of LUMP is normalized at 100 au.

**Table S1. Amino acid sequences of LUMP constructs**

| Protein             | Amino acid sequence                                                                                                                                                                                                                                                                                                                                                                                                                                             |
|---------------------|-----------------------------------------------------------------------------------------------------------------------------------------------------------------------------------------------------------------------------------------------------------------------------------------------------------------------------------------------------------------------------------------------------------------------------------------------------------------|
| LUMP                | MGSSHHHHHHDYDIPTTENLYFQ//GHMFRGIVQGRGVIRISIKSEDSQRHGIAFPEGMFQLVDVDTVMLVNGCSLTVVRILGDMVYFDIDQALGTTFDGLKEGDQVNLEIHPKFGVEVGRGGLTGNIKGTALVAAIEENDAGFSVLIDIPKGLAENLTVKDDIGIDGSLPITDMSDSIITLNYSRDLASTN-IASLAKDVKNVEILNEW                                                                                                                                                                                                                                              |
| LUMP-GBD            | MGSSHHHHHHDYDIPTTENLYFQ//GHMGLSAQDISQPLQNSFIHTGHGSDSPRHWCWGFPRIDELYLNGSGSASFGRGIVQGRGVIRISIKSEDSQRHGIAFPEGMFQLVDVDTVMLVNGCSLTVVRILGDMVYFDIDQALGTTTFDGLKEGDQVNLEIHPKFGVEVGRGGLTGNIKGTALVAAIEENDAGFSVLIDIPKGLAENLTVKDDIGIDGSLPITDMSDSIITLNYSRDLASTNIASLAKDVKNVEILNEW                                                                                                                                                                                              |
| Venus-LUMP          | MGSSHHHHHHDYDIPTTENLYFQ//GHMVSKGEELFTGVVPILVELDGDVNGHKFSVSGEGEGDATYGKLTGKLPVPWPTLVTTFGYGLMCFARYPDHMKQHDFFKSAMPEGYVQERTIFFKDDGNYKTRAEVKFEGDGLVNRIELKGFIDFKEDGNILGHKLEYNYNSHNVYIMADKQKNGIKVNFKIRHNIEDGSQLADHYQQNTPIGDGPVLLPDNHYLSYQSALSADPNKRDHMLLEFVTAAGITLGMDELYKASFRGIVQGRGVIRISIKSEDSQRHGIAFPEGMFQLVDVDTVMLVNGCSLTVVRILGDMVYFDIDQALGTTTFDGLKEGDQVNLEIHPKFGVEVGRGGLTGNIKGTALVAAIEENDAGFSVLIDIPKGLAENLTVKDDIGIDGSLPITDMSDSIITLNYSRDLASTNIASLAKDVKNVEILNEW       |
| Venus-thrombin-LUMP | MGSSHHHHHHDYDIPTTENLYFQ//GHMVSKGEELFTGVVPILVELDGDVNGHKFSVSGEGEGDATYGKLTGKLPVPWPTLVTTFGYGLMCFARYPDHMKQHDFFKSAMPEGYVQERTIFFKDDGNYKTRAEVKFEGDGLVNRIELKGFIDFKEDGNILGHKLEYNYNSHNVYIMADKQKNGIKVNFKIRHNIEDGSQLADHYQQNTPIGDGPVLLPDNHYLSYQSALSADPNKRDHMLLEFVTAAGITLGMDELYKASLVPGRSFRGIVQGRGVIRISIKSEDSQRHGIAFPEGMFQLVDVDTVMLVNGCSLTVVRILGDMVYFDIDQALGTTTFDGLKEGDQVNLEIHPKFGVEVGRGGLTGNIKGTALVAAIEENDAGFSVLIDIPKGLAENLTVKDDIGIDGSLPITDMSDSIITLNYSRDLASTNIASLAKDVKNVEILNEW |

All proteins were purified with the affinity tag removed with TEV protease. The cut site is denoted by the symbol //.

**Table S2. Fluorescence lifetime measurements**

| Protein    | A <sub>1</sub> | τ <sub>1</sub> (ns) | A <sub>2</sub> | τ <sub>2</sub> (ns) |
|------------|----------------|---------------------|----------------|---------------------|
| LUMP       | 0.28 ± 0.011   | 6.3 ± 0.2           | 0.65 ± 0.01    | 14.91 ± 0.09        |
| LUMP-GBD   | 0.37 ± 0.007   | 6.0 ± 0.1           | 0.55 ± 0.01    | 13.15 ± 0.06        |
| Venus-LUMP | 0.93 ± 0.002   | 4.17 ± 0.01         | 0.04 ± 0.002   | 12.9 ± 0.3          |

Pre-exponential factor A and fluorescence lifetime τ with SEs. The average fluorescence lifetimes are calculated from the two fluorescent components above as described in *Methods*.

**Table S3. Average fluorescence lifetimes (τ<sub>avg</sub>)**

| Protein             | τ <sub>avg</sub> (ns) |
|---------------------|-----------------------|
| LUMP                | 13.6                  |
| LUMP-GBD            | 11.5                  |
| Venus-LUMP          | 5.20                  |
| Venus-thrombin-LUMP | 6.64                  |
